# Supplementary material
Source: MDPI journal article supplement (https://www.mdpi.com/2073-4352/13/5/808)
Supplement: s1 [file s1]

## Supplementary Materials:

The following supporting information can be downloaded at: [www.mdpi.com/xxx/s1](http://www.mdpi.com/xxx/s1).

### Cocrystal Screening List

Table S1: List of the potential coformers and results of grinding experiments: **P** indicates diffractograms showing a mixture of the parent compounds, **X** denotes the diffractograms where new peaks were observed suggesting the identification of a new (salt) cocrystal or a new salt (8), **A** refers to the experiments that led to an amorphous phase (5).

| CCFs tested                                        | Results |
|----------------------------------------------------|---------|
| (D)-(+)-Camphoric acid                             | P       |
| (D)-Phenylglycinamide                              | A       |
| (D, L)-3-Phenyllactic acid                         | P       |
| (D, L)-Aspartic acid                               | P       |
| (D, L)-Histidine                                   | P       |
| (D, L)-Tryptophan                                  | P       |
| (DL)-Mandelic acid                                 | P       |
| (L)-3-Phenyllactic acid                            | P       |
| (L)-Aspartic acid                                  | P       |
| (L)-Histidine                                      | P       |
| (L)-Malic acid                                     | P       |
| (L)-Phenylalanine                                  | P       |
| (L)-Phenylglycine                                  | P       |
| (L)-Proline                                        | A       |
| (L)-Tryptophan                                     | P       |
| (L)-Tyrosine                                       | P       |
| (R)-(-)-2-Phenylglycine methyl ester hydrochloride | P       |
| (R)-Mandelic acid                                  | P       |
| (R, S)-1-(4-Bromophenyl)ethylamine                 | A       |
| (R, S)-2-Phenylbutyric acid                        | P       |
| (R, S)-Diphylline                                  | P       |
| (R, S)-Ibuprofen                                   | P       |
| (S)-2-Pyrrolidone-5-carboxylic acid                | P       |
| (S)-Ibuprofen                                      | P       |
| 1-Hydroxy-2-naphtoic acid                          | P       |
| 2,2-Dimethylsuccinic acid                          | P       |
| 2,3-Dihydroxybenzoic acid                          | P       |
| 2,4-Dihydroxybenzoic acid                          | P       |
| 2,5-Dihydroxybenzoic acid                          | P       |
| 2-Amino-6-chloropurine                             | P       |
| 3,4-Dihydroxybenzoic acid                          | P       |
| 3,5-Dihydroxybenzoic acid                          | P       |
| 4-Aminobenzoic acid                                | P       |
| 4-Aminobenzoic acid                                | P       |
| 4-Hydroxybenzoic acid                              | P       |
| 4-Nitrobenzamide                                   | X       |
| 4-Nitrobenzoic acid                                | P       |
| 5-(Hydroxymethyl)uracil                            | P       |

|                             |   |
|-----------------------------|---|
| 5-Aminouracil               | P |
| 5-Carboxy-2-thiouracil      | A |
| 5-Methyl-2-thiouracil       | P |
| 5-Methyl-2-thiouracil       | P |
| 5-Propyl-2-thiouracil       | P |
| 6-(Chloromethyl)uracil      | P |
| 6-Aminouracil               | P |
| 6-Chlorouracil              | P |
| Adenine                     | X |
| Caffeine                    | X |
| Carbamazepine               | X |
| Citraconic acid             | P |
| Citric acid                 | P |
| Dithiouracil                | P |
| Ethyl 7-theophyllineacetate | P |
| Fumaric acid                | P |
| Hippuric acid               | P |
| Hypoxanthine                | X |
| Indoprofen                  | P |
| Isonicotinamide             | X |
| Menadione                   | P |
| Methylsuccinic acid         | P |
| Nicotinamide                | X |
| Orotic acid anhydrous       | P |
| Oxalic acid                 | P |
| Oxcarbazepine               | P |
| Pyrazinamide                | P |
| Theobromine                 | P |
| Theophylline                | X |
| Theophylline-7-acetic acid  | P |
| Thymine                     | P |
| Trans-4-hydroxy-L-proline   | A |
| Trans-cinnamic acid         | P |
| Uric acid                   | P |
| Xanthine                    | P |

### X-ray Powder Diffraction Data

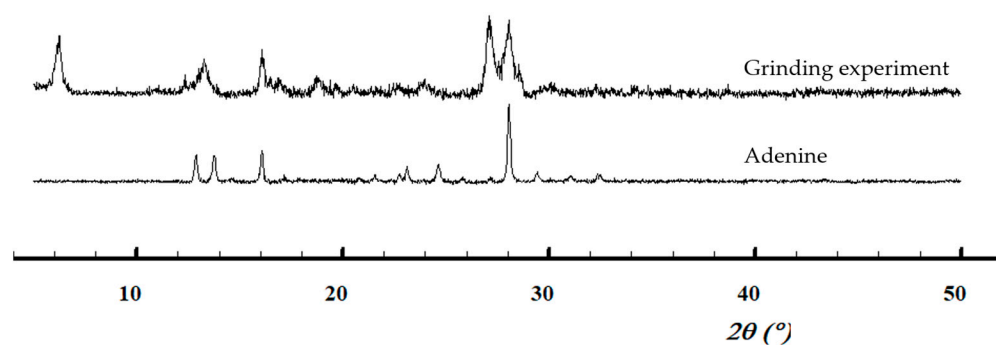

Figure S1: Normalised experimental diffraction patterns of the ground powder of Pyruvic Acid and Adenine (1:1 ratio) and of Adenine.

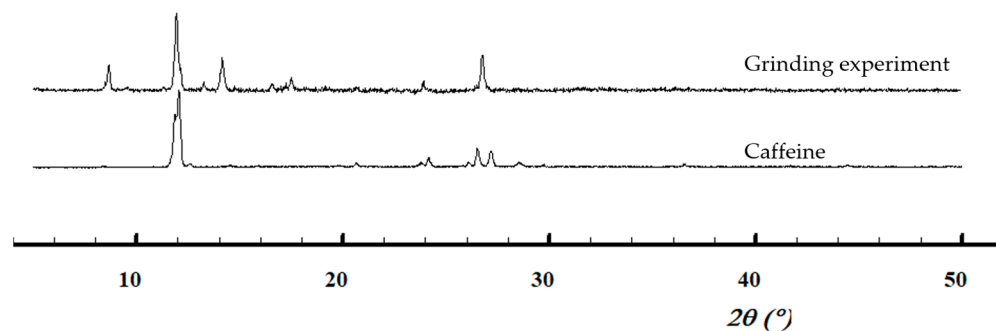

Figure S2: Normalised experimental diffraction patterns of the ground powder of Pyruvic Acid and Caffeine (1:4 ratio) and of Caffeine.

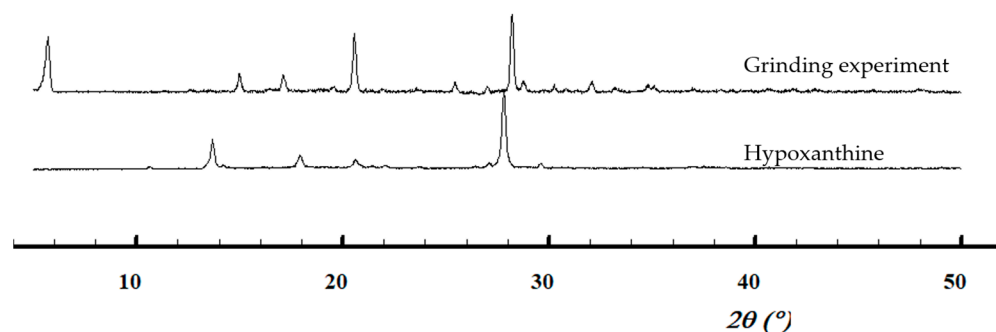

Figure S3: Normalised experimental diffraction patterns of the ground powder of Pyruvic Acid and Hypoxanthine (1:4 ratio) and of Hypoxanthine.

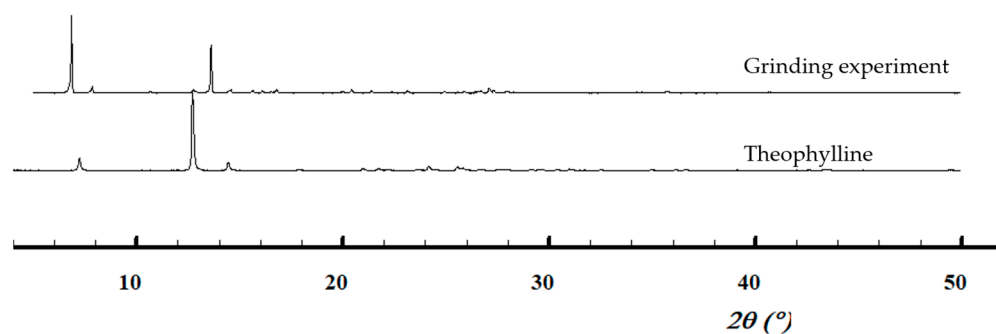

Figure S4: Normalised experimental diffraction patterns of the ground powder of Pyruvic Acid and Theophylline (1:4 ratio) and of Theophylline.

## Single-Crystal X-ray Diffraction Data

Table S2. Crystal data and structure refinement for the 1:1 Pyruvic acid-4-Nitrobenzamide cocrystal.

| Identification code                     | 1:1 Pyruvic acid-4-Nitrobenzamide Cocrystal                                                                                               |
|-----------------------------------------|-------------------------------------------------------------------------------------------------------------------------------------------|
| Empirical formula                       | $C_7H_6N_2O_3$ , $C_3H_4O_3$                                                                                                              |
| Formula weight                          | 254.20                                                                                                                                    |
| Temperature                             | 295(2) K                                                                                                                                  |
| Wavelength                              | 0.71073 Å                                                                                                                                 |
| Crystal system                          | Monoclinic                                                                                                                                |
| Space group                             | $P2_1/n$                                                                                                                                  |
| Unit cell dimensions                    | $a = 5.3463(5)$ Å<br>$b = 19.6423(14)$ Å<br>$c = 10.8234(7)$ Å<br>$\alpha = 90^\circ$<br>$\beta = 90.316(7)^\circ$<br>$\gamma = 90^\circ$ |
| Volume                                  | $1136.59(16)$ Å <sup>3</sup>                                                                                                              |
| Z                                       | 4                                                                                                                                         |
| Density (calculated)                    | $1.486$ mg/m <sup>3</sup>                                                                                                                 |
| Absorption coefficient                  | $0.125$ mm <sup>-1</sup>                                                                                                                  |
| $F_{000}$                               | 528                                                                                                                                       |
| Crystal size                            | $0.35 \times 0.05 \times 0.05$ mm <sup>3</sup>                                                                                            |
| Theta range for data collection         | $3.637$ to $25.018^\circ$                                                                                                                 |
| Index ranges                            | $-6 \leq h \leq 6$ , $-23 \leq k \leq 23$ , $0 \leq l \leq 12$                                                                            |
| Reflections collected                   | 1988                                                                                                                                      |
| Independent reflections                 | 1988 [ $R_{int} = 0$ ]*                                                                                                                   |
| Completeness to $\theta = 25.018^\circ$ | 98.8 %                                                                                                                                    |
| Absorption correction                   | Semi-empirical from equivalents                                                                                                           |
| Max. and min. transmission              | 1.00000 and 0.62615                                                                                                                       |
| Refinement method                       | Full-matrix least-squares on $F^2$                                                                                                        |
| Data / restraints / parameters          | 1988 / 0 / 166                                                                                                                            |
| Goodness-of-fit on $F^2$                | 1.070                                                                                                                                     |
| Final R indices [ $I > 2\sigma$ ]       | $R_1 = 0.0465$ , $wR_2 = 0.1156$                                                                                                          |
| R indices (all data)                    | $R_1 = 0.0744$ , $wR_2 = 0.1292$                                                                                                          |
| Extinction coefficient                  | n/a                                                                                                                                       |
| Largest diff. peak and hole             | $0.164$ and $-0.166$ e.Å <sup>-3</sup>                                                                                                    |

\*twinned structure refined against HKLF5 formatted reflections

Table S3. Crystal data and structure refinement for 1:1 Pyruvic Acid-Carbamazepine cocrystal.

| Identification code                    | 1:1 Pyruvic Acid-Carbamazepine                                                                     |
|----------------------------------------|----------------------------------------------------------------------------------------------------|
| Empirical formula                      | C <sub>15</sub> H <sub>12</sub> N <sub>2</sub> O, C <sub>3</sub> H <sub>4</sub> O <sub>3</sub>     |
| Formula weight                         | 324.33                                                                                             |
| Temperature                            | 297(2) K                                                                                           |
| Wavelength                             | 0.71073 Å                                                                                          |
| Crystal system                         | Monoclinic                                                                                         |
| Space group                            | <i>P</i> 2 <sub>1</sub> / <i>n</i>                                                                 |
| Unit cell dimensions                   | a = 5.3912(6) Å<br>b = 16.6752(15) Å<br>c = 18.2383(18) Å<br>α = 90°<br>β = 97.324(10)°<br>γ = 90° |
| Volume                                 | 1626.2(3) Å <sup>3</sup>                                                                           |
| Z                                      | 4                                                                                                  |
| Density (calculated)                   | 1.325 mg/m <sup>3</sup>                                                                            |
| Absorption coefficient                 | 0.095 mm <sup>-1</sup>                                                                             |
| F <sub>000</sub>                       | 680                                                                                                |
| Crystal size                           | 0.40 × 0.04 × 0.04 mm <sup>3</sup>                                                                 |
| Theta range for data collection        | 3.323 to 25.240°                                                                                   |
| Index ranges                           | −6 ≤ h ≤ 6, −20 ≤ k ≤ 20, −21 ≤ l ≤ 21                                                             |
| Reflections collected                  | 9499                                                                                               |
| Independent reflections                | 2897 [R <sub>int</sub> = 0.0623]                                                                   |
| Completeness to theta = 25.240°        | 98.3 %                                                                                             |
| Absorption correction                  | Semi-empirical from equivalents                                                                    |
| Max. and min. transmission             | 1.00000 and 0.57011                                                                                |
| Refinement method                      | Full-matrix least-squares on F <sup>2</sup>                                                        |
| Data / restraints / parameters         | 2897 / 109 / 274                                                                                   |
| Goodness-of-fit on F <sup>2</sup>      | 1.172                                                                                              |
| Final R indices [I > 2σ <sub>I</sub> ] | R <sub>1</sub> = 0.0757, wR <sub>2</sub> = 0.1160                                                  |
| R indices (all data)                   | R <sub>1</sub> = 0.1343, wR <sub>2</sub> = 0.1330                                                  |
| Extinction coefficient                 | n/a                                                                                                |
| Largest diff. peak and hole            | 0.134 and −0.160 e.Å <sup>-3</sup>                                                                 |

Table S4. Crystal data and structure refinement for 1:1 Pyruvic Acid-Isonicotinamide salt.

| Identification code                    | 1:1 Pyruvic Acid-Isonicotinamide                                                                |
|----------------------------------------|-------------------------------------------------------------------------------------------------|
| Empirical formula                      | C <sub>6</sub> H <sub>7</sub> N <sub>2</sub> O, C <sub>3</sub> H <sub>3</sub> O <sub>3</sub>    |
| Formula weight                         | 210.19                                                                                          |
| Temperature                            | 297(2) K                                                                                        |
| Wavelength                             | 0.71073 Å                                                                                       |
| Crystal system                         | Monoclinic                                                                                      |
| Space group                            | <i>P</i> 2 <sub>1</sub> / <i>n</i>                                                              |
| Unit cell dimensions                   | a = 3.8349(6) Å<br>b = 33.160(5) Å<br>c = 7.6010(11) Å<br>α = 90°<br>β = 97.015(13)°<br>γ = 90° |
| Volume                                 | 959.4(3) Å <sup>3</sup>                                                                         |
| Z                                      | 4                                                                                               |
| Density (calculated)                   | 1.455 mg/m <sup>3</sup>                                                                         |
| Absorption coefficient                 | 0.116 mm <sup>-1</sup>                                                                          |
| F <sub>000</sub>                       | 440                                                                                             |
| Crystal size                           | 0.30 × 0.05 × 0.04 mm <sup>3</sup>                                                              |
| Theta range for data collection        | 2.769 to 25.240°                                                                                |
| Index ranges                           | −4 ≤ h ≤ 4, −39 ≤ k ≤ 38, −9 ≤ l ≤ 9                                                            |
| Reflections collected                  | 5789                                                                                            |
| Independent reflections                | 1742 [R <sub>int</sub> = 0.0614]                                                                |
| Completeness to theta = 25.240°        | 99.5 %                                                                                          |
| Absorption correction                  | Semi-empirical from equivalents                                                                 |
| Max. and min. transmission             | 1.00000 and 0.61875                                                                             |
| Refinement method                      | Full-matrix least-squares on F <sup>2</sup>                                                     |
| Data / restraints / parameters         | 1742 / 0 / 137                                                                                  |
| Goodness-of-fit on F <sup>2</sup>      | 1.092                                                                                           |
| Final R indices [I > 2σ <sub>I</sub> ] | R <sub>1</sub> = 0.0904, wR <sub>2</sub> = 0.2090                                               |
| R indices (all data)                   | R <sub>1</sub> = 0.1115, wR <sub>2</sub> = 0.2215                                               |
| Extinction coefficient                 | n/a                                                                                             |
| Largest diff. peak and hole            | 0.343 and −0.316 e.Å <sup>-3</sup>                                                              |

Table S5. Crystal data and structure refinement for 2:3 Pyruvic Acid-Nicotinamide salt cocrystal.

| Identification code                     | 2:3 Pyruvic Acid-Nicotinamide                                                                                                             |
|-----------------------------------------|-------------------------------------------------------------------------------------------------------------------------------------------|
| Empirical formula                       | $2(\text{C}_6\text{H}_7\text{N}_2\text{O}), 2(\text{C}_3\text{H}_3\text{O}_3), \text{C}_3\text{H}_4\text{O}_3$                            |
| Formula weight                          | 508.44                                                                                                                                    |
| Temperature                             | 293(2) K                                                                                                                                  |
| Wavelength                              | 0.71073 Å                                                                                                                                 |
| Crystal system                          | Monoclinic                                                                                                                                |
| Space group                             | $P2_1/n$                                                                                                                                  |
| Unit cell dimensions                    | $a = 3.82010(12)$ Å<br>$b = 33.2921(9)$ Å<br>$c = 9.5234(2)$ Å<br>$\alpha = 90^\circ$<br>$\beta = 98.606(3)^\circ$<br>$\gamma = 90^\circ$ |
| Volume                                  | $1197.54(6)$ Å <sup>3</sup>                                                                                                               |
| Z                                       | 2                                                                                                                                         |
| Density (calculated)                    | $1.410 \text{ mg/m}^3$                                                                                                                    |
| Absorption coefficient                  | $0.116 \text{ mm}^{-1}$                                                                                                                   |
| $F_{000}$                               | 532                                                                                                                                       |
| Crystal size                            | $0.23 \times 0.15 \times 0.10 \text{ mm}^3$                                                                                               |
| Theta range for data collection         | $2.837$ to $26.214^\circ$                                                                                                                 |
| Index ranges                            | $-4 \leq h \leq 4, -41 \leq k \leq 37, -11 \leq l \leq 11$                                                                                |
| Reflections collected                   | 8571                                                                                                                                      |
| Independent reflections                 | 2357 [ $R_{\text{int}} = 0.0166$ ]                                                                                                        |
| Completeness to $\theta = 25.242^\circ$ | 98.3 %                                                                                                                                    |
| Absorption correction                   | Semi-empirical from equivalents                                                                                                           |
| Max. and min. transmission              | 1.00000 and 0.86352                                                                                                                       |
| Refinement method                       | Full-matrix least-squares on $F^2$                                                                                                        |
| Data / restraints / parameters          | 2357 / 58 / 192                                                                                                                           |
| Goodness-of-fit on $F^2$                | 1.098                                                                                                                                     |
| Final R indices [ $I > 2\sigma$ ]       | $R_1 = 0.0482, wR_2 = 0.1360$                                                                                                             |
| R indices (all data)                    | $R_1 = 0.0516, wR_2 = 0.1384$                                                                                                             |
| Extinction coefficient                  | n/a                                                                                                                                       |
| Largest diff. peak and hole             | $0.233$ and $-0.198 \text{ e.Å}^{-3}$                                                                                                     |

Proton Nuclear Magnetic Resonance ( $^1\text{H}$  NMR) Data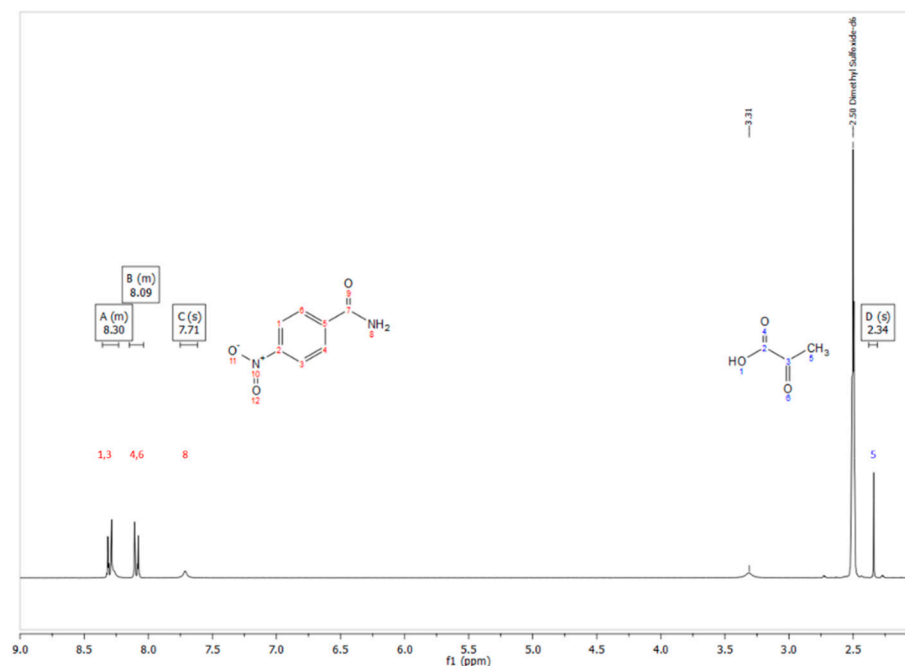

Figure S5: Proton NMR spectrum of 4-Nitrobenzamide-Pyruvic acid 1:1 cocrystal. The numbers corresponding to the protons of 4-nitrobenzamide are coloured in red while the numbers corresponding to the protons of pyruvic acid are coloured in blue.  $^1\text{H}$  NMR (300 MHz, DMSO)  $\delta$  8.33 – 8.25 (m, 4H, -C $_6$ H $_4$ , 1,3), 8.16 – 8.04 (m, 4H, -C $_6$ H $_4$ , 4,6), 7.71 (bs, 2H, -NH $_2$ , 8), 2.34 (s, 3H, -CH $_3$ , 5).  $\delta$  3.31 residual water peak.

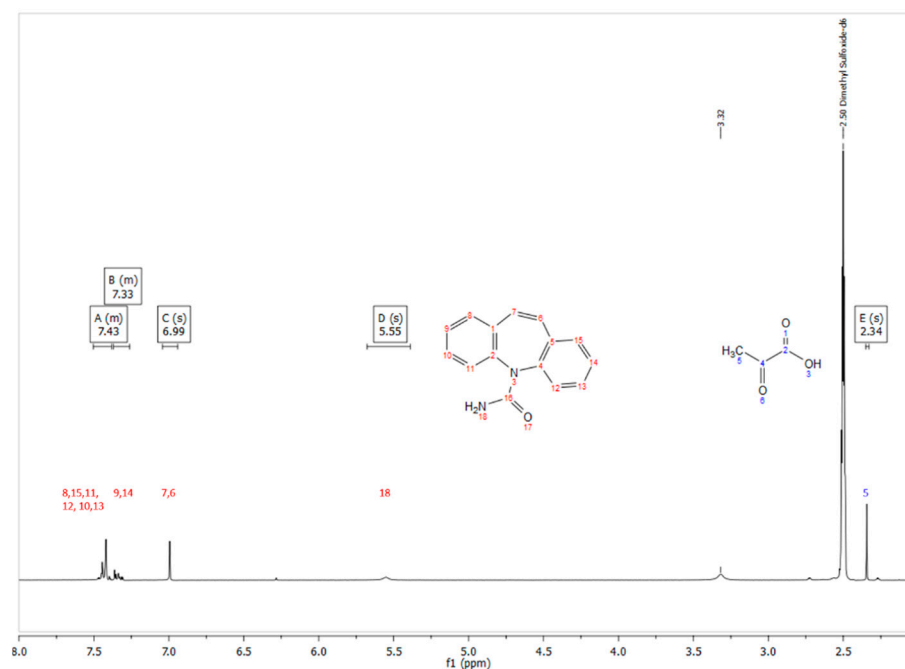

Figure S6: Proton NMR spectrum of Carbamazepine-Pyruvic acid 1:1 cocrystal. The numbers corresponding to the protons of carbamazepine are coloured in red while the numbers corresponding to the protons of pyruvic acid are coloured in blue.  $^1\text{H}$  NMR (300 MHz, DMSO)  $\delta$  7.50 – 7.38 (m, 6H, -C $_6$ H $_4$ , 8,10,11,12,13,15), 7.37 – 7.26 (m, 2H, C $_6$ H $_4$ , 9,14), 6.99 (s, 2H, -C $_6$ H $_4$ , 7,6), 5.55 (s, 2H, -NH $_2$ , 18), 2.34 (s, 3H, -CH $_3$ , 5).  $\delta$  3.31 residual water peak.



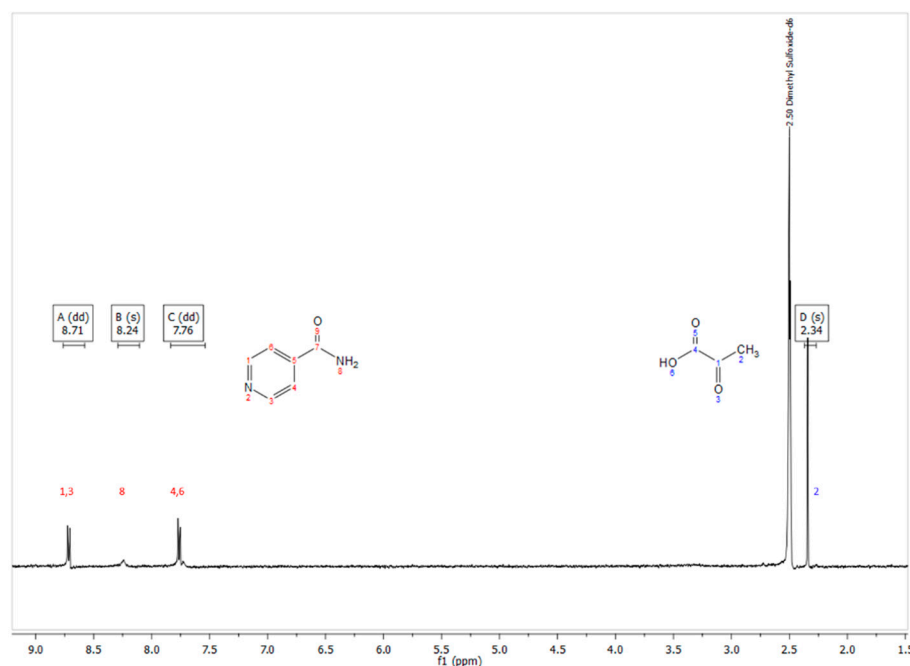

Figure S7: Proton NMR spectrum of Isonicotinamide-Pyruvic acid 1:1 salt. The numbers corresponding to the protons of isonicotinamide are coloured in red while the numbers corresponding to the protons of pyruvic acid are coloured in blue. <sup>1</sup>H NMR (300 MHz, DMSO) δ 8.71 (dd, *J* = 4.4, 1.6 Hz, 2H, C<sub>Ar</sub>H, 1,3), 8.24 (s, 2H, -NH<sub>2</sub>, 8), 7.76 (dd, *J* = 4.4, 1.7 Hz, 2H, C<sub>Ar</sub>H, 4,6), 2.34 (s, 3H, -CH<sub>3</sub>, 2).

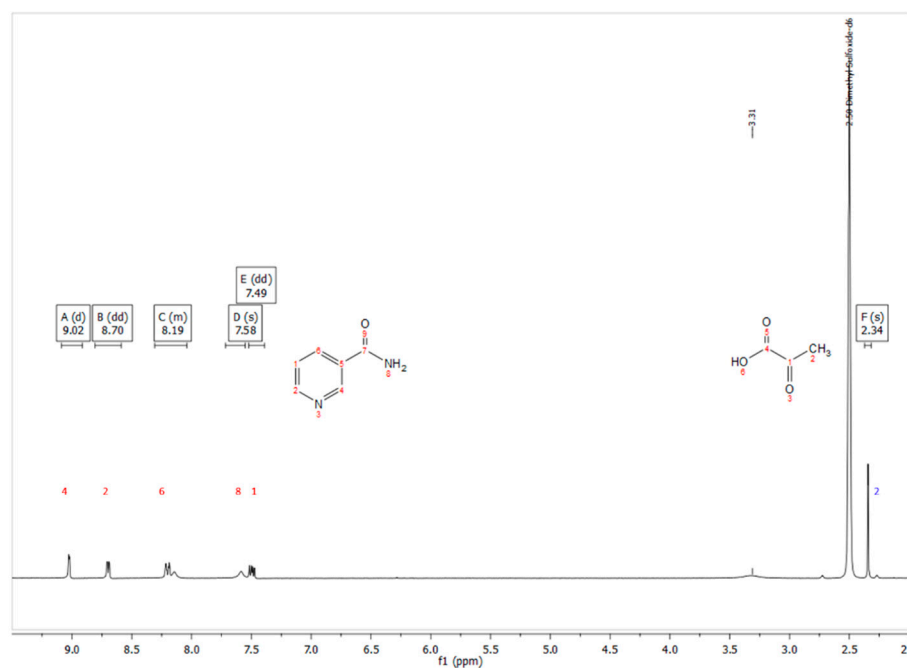

Figure S8: Proton NMR spectrum of Nicotinamide-Pyruvic acid 2:3 salt cocrystal. The numbers corresponding to the protons of nicotinamide are coloured in red while the numbers corresponding to the protons of pyruvic acid are coloured in blue. <sup>1</sup>H NMR (300 MHz, DMSO) δ 9.02 (d, *J* = 1.8 Hz, 1H, C<sub>Ar</sub>H, 4), 8.70 (dd, *J* = 4.8, 1.6 Hz, 1H, C<sub>Ar</sub>H, 2), 8.31–8.04 (m, 1H, C<sub>Ar</sub>H, 6), 7.58 (s, 1H, -NH<sub>2</sub>, 8), 7.49 (dd, *J* = 7.9, 4.8 Hz, 1H, C<sub>Ar</sub>H, 1), 2.34 (s, 5H, -CH<sub>3</sub>, 2).

## Thermogravimetric analysis (TGA)

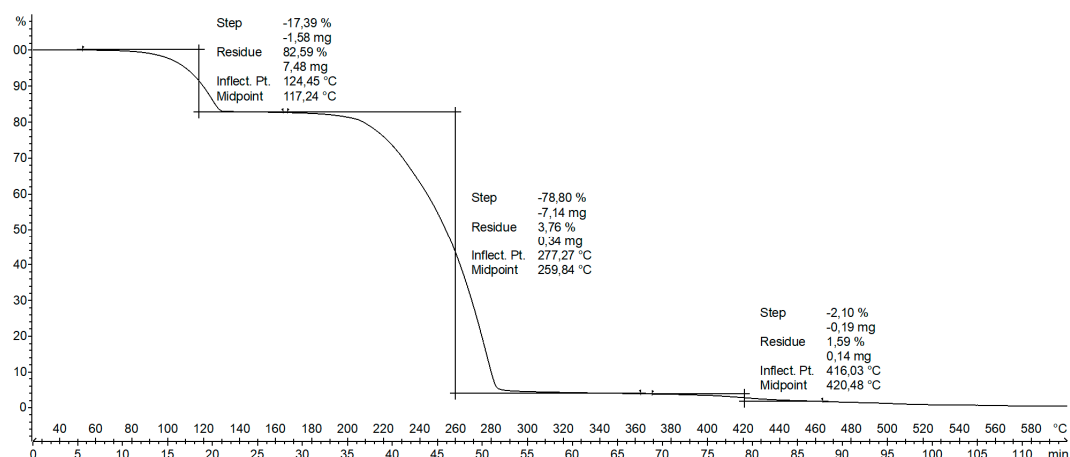

Figure S9: Thermogravimetric analysis of 4-Nitrobenzamide-Pyruvic acid 1:1 cocrystal obtained by slurry (1:1) in acetonitrile (initial sample mass: 9.06 mg), expressed in weight loss % as a function of temperature (°C) and time (min).

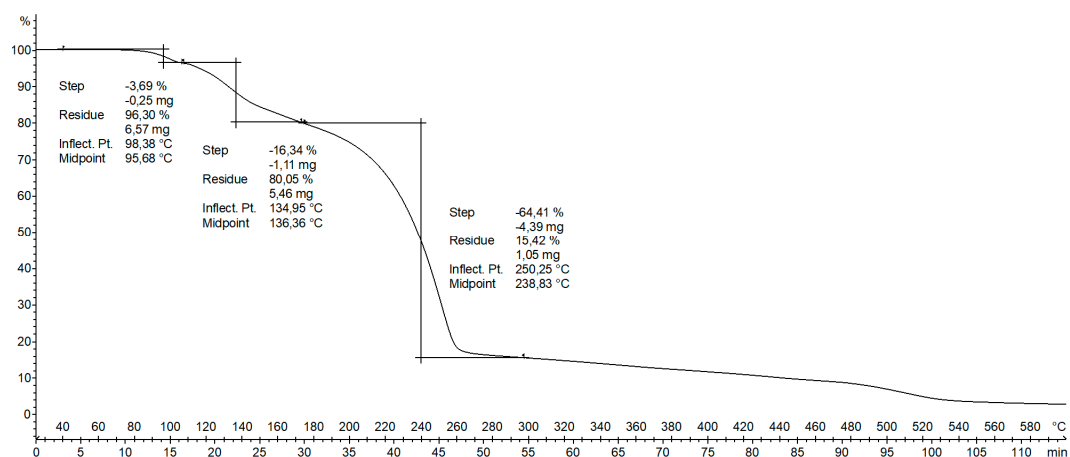

Figure S10: Thermogravimetric analysis of Carbamazepine-Pyruvic acid 1:1 cocrystal obtained by slurry (1:4) in acetonitrile (initial sample mass: 6.82 mg), expressed in weight loss % as a function of temperature (°C) and time (min).

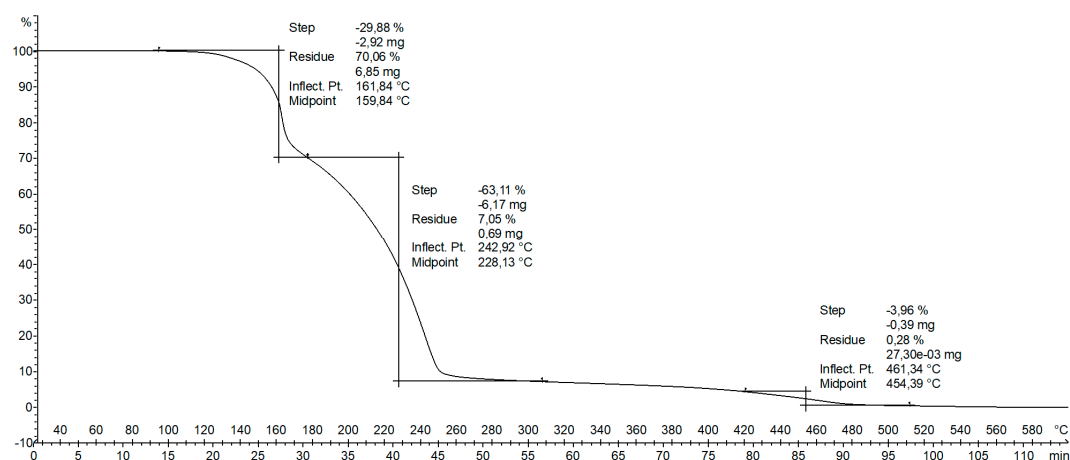

Figure S11: Thermogravimetric analysis of Isonicotinamide-Pyruvic acid 1:1 salt obtained by slurry (1:1) in acetonitrile (initial sample mass: 9.78 mg), expressed in weight loss % as a function of temperature (°C) and time (min).

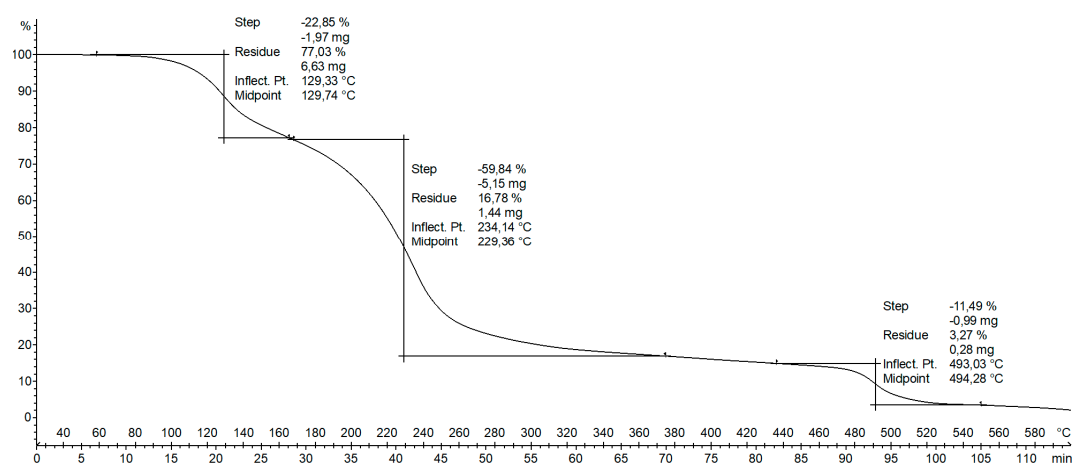

Figure S12: Thermogravimetric analysis of Nicotinamide-Pyruvic acid 2:3 salt cocrystal obtained by slurry (1:1) in ethyl acetate (initial sample mass: 8.61 mg), expressed in weight loss % as a function of temperature (°C) and time (min).

### Differential Scanning Calorimetry (DSC) Analysis

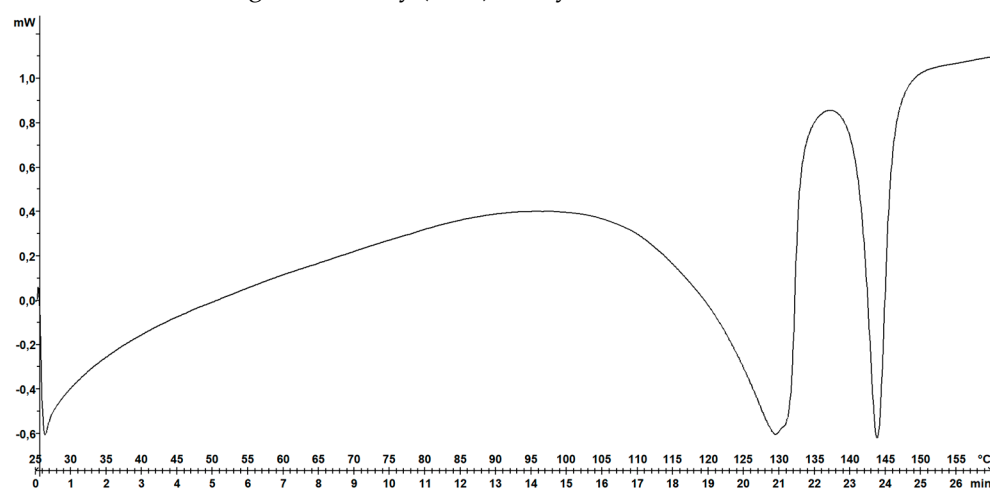

Figure S13: DSC analysis of the 4-Nitrobenzamide-Pyruvic acid 1:1 cocrystal obtained by slurry (1:1) in ethyl acetate, expressed in mW as a function of temperature (°C) and time (min).

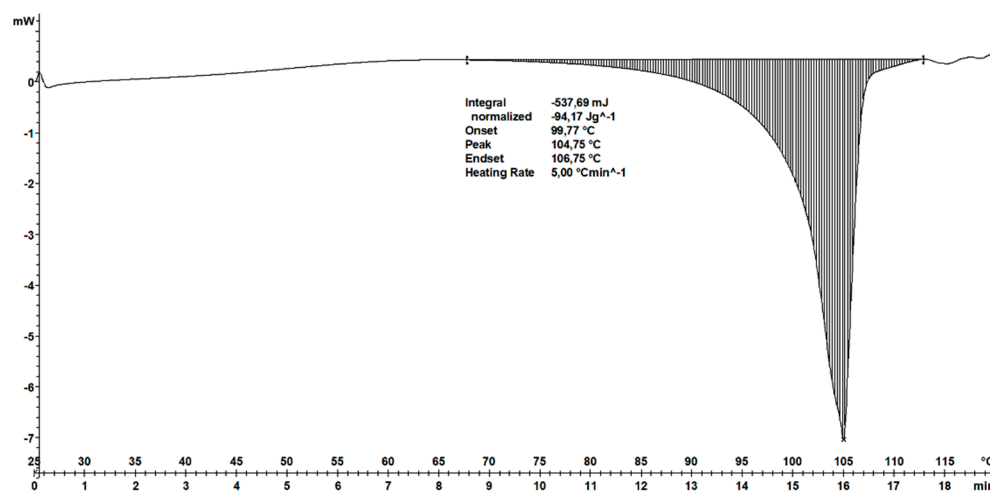

Figure S14: DSC analysis of the Carbamazepine-Pyruvic acid 1:1 cocrystal obtained by slurry (1:4) in ethyl acetate, expressed in mW as a function of temperature (°C) and time (min).

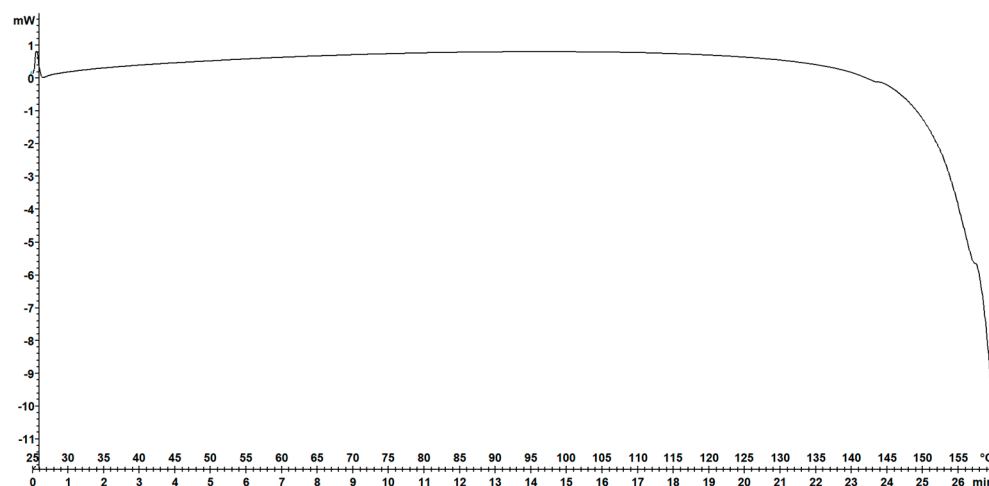

Figure S15: DSC analysis of the Isonicotinamide-Pyruvic acid 1:1 salt obtained by slurry (1:1) in acetonitrile, expressed in mW as a function of temperature (°C) and time (min).

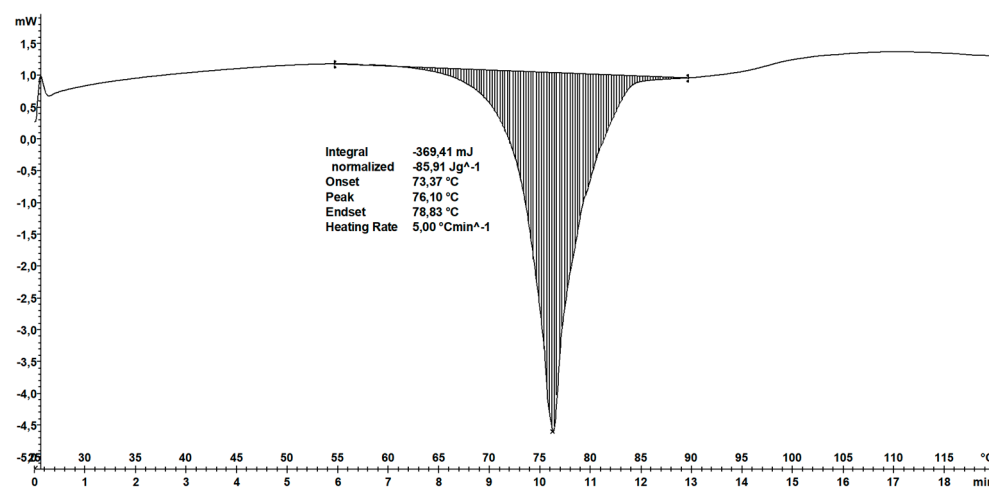

Figure S16: DSC analysis of the Nicotinamide-Pyruvic acid 2:3 salt cocrystal obtained by slurry (1:1) in ethyl acetate, expressed in mW as a function of temperature (°C) and time (min).

### Example of combination of TGA and DSC Analysis

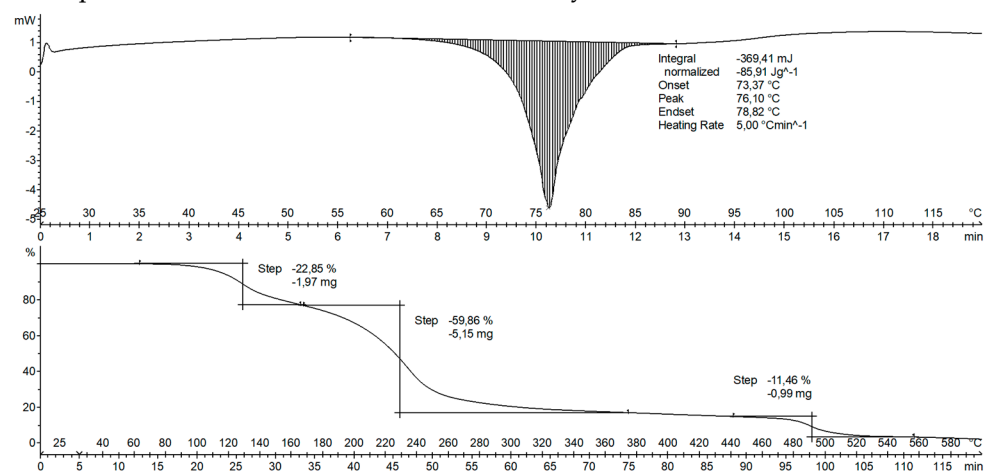

Figure S17: Combination of DSC analysis (expressed in mW as a function of temperature (°C) and time (min)) and TGA analysis (initial sample mass: 8.61 mg, expressed in weight loss % as a function of temperature (°C) and time (min)) of the Nicotinamide-Pyruvic acid 2:3 salt cocrystal obtained by slurry (1:1) in ethyl acetate.
